# Supplementary material
Source: Springer Nature journal article supplement (https://www.springermedizin.de/resource/supplementary/12889_2009_2349_MOESM2_ESM.pdf/9485480)

Potentially relevant studies identified  
and screened for retrieval based on title  
and abstract  
(N=397)

Ineligible studies excluded (not  
empirical, no intervention)  
(N= 377)

Studies retrieved and assessed on  
full papers  
(N= 20)

Studies excluded (duplicate  
interventions, quality issues)  
(N= 9)

Studies that met inclusion  
criteria and were included in  
the review  
(N= 11)

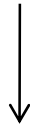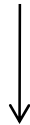

Supplement: MOESM2 [file 9485480]
